# Supplementary material for: Risk factors associated with self-medication among the indigenous communities of Chittagong Hill Tracts, Bangladesh
Source: PubMed Central journal article supplement (PMC9191716; doi:10.1371/journal.pone.0269622), 2022-06-13
Supplement: pone.0269622.s006.pdf [file pone.0269622.s006.pdf]

বাংলাদেশে বসবাসরত আদিবাসী জনগোষ্ঠীদের মধ্যে স্ব-প্রণোদিত ঔষধ ব্যবহারের প্রবণতা

সাক্ষাৎকার গ্রহণকারীর আইডিঃ

সাক্ষাৎকার গ্রহণের তারিখঃ

সাক্ষাৎ প্রদানকারী স্বেচ্ছায় গবেষণায় অংশগ্রহণ করতে সম্মতি দিয়েছেন?  হ্যাঁ  না

১. নাম :

২. বর্তমান ঠিকানা: পাড়া /মহল্লা /গ্রাম ..... থানা ..... ডাকঘর .....

উপজেলা ..... জেলা ....., বাংলাদেশ।

৩. স্থায়ী ঠিকানা: পাড়া /মহল্লা /গ্রাম ..... থানা ..... ডাকঘর .....

উপজেলা ..... জেলা ....., বাংলাদেশ।

৪. মোবাইল নাম্বার (আবশ্যিক) :

➤ ১ম বিভাগ - সামাজিক জনসংখ্যা তথ্য :

৫. বৈবাহিক অবস্থা :  বিবাহিত  অবিবাহিত  ডিভোর্স  বিধবা/ বিপন্নিক

৬. বয়স : ..... বছর

৭. জাতিগোষ্ঠী :  চাকমা  মারমা  ত্রিপুরা  তঞ্চঙ্গ্যা  বম  অন্যান্য .....

৮. বিভাগ :  খাগড়াছড়ি  রাংগামাটি  বান্দরবান

৯. উচ্চতা : ..... ফুট ..... ইঞ্চি

১০. ওজন : ..... কেজি

১১. লিঙ্গ :  পুরুষ  নারী  অন্যান্য .....

১২. শিক্ষাগত যোগ্যতা :  নিরক্ষর  প্রাথমিক  মাধ্যমিক  উচ্চমাধ্যমিক  স্নাতক

১৩. পেশা :  কৃষিকাজ  দিনমজুর  ব্যবসা  চিকিৎসা কর্মী  তাঁতশিল্প

গৃহিণী  চাকুরীজীবী  ছাত্র  বেকার  অন্যান্য .....

➤ ২য় বিভাগ – শারীরিক অসুস্থতা ও ঔষধ গ্রহণের প্রবণতা বিষয়ক তথ্য :

১৪. বর্তমানে আপনি নিম্নের কোন রোগে ভুগছেন? (প্রযোজ্য ক্ষেত্রে একাধিক টিক চিহ্ন দিন)

হৃদরোগ  চর্মরোগ  স্নায়বিক রোগ  শ্বাসপ্রশ্বাস জনিত রোগ  চোখের সমস্যা

কিডনির রোগ  উচ্চরক্তচাপ  ক্যান্সার  অস্থিরতা  লিভারের রোগ

ডায়াবেটিস  নিম্নরক্তচাপ  থাইরয়েডের সমস্যা  কোনোটিই নয়  প্রযোজ্য নয়

১৫. গত এক বছরে নিম্নের কোন রোগে ভুগেছেন? (প্রযোজ্য ক্ষেত্রে একাধিক টিক চিহ্ন দিন)

- |                                             |                                                    |                                       |                                       |
|---------------------------------------------|----------------------------------------------------|---------------------------------------|---------------------------------------|
| <input type="checkbox"/> জ্বর/ সর্দি/ কাশি  | <input type="checkbox"/> মাথাব্যথা                 | <input type="checkbox"/> বাতের ব্যাথা | <input type="checkbox"/> ডায়রিয়া    |
| <input type="checkbox"/> হাঁপানি/ শ্বাসকষ্ট | <input type="checkbox"/> দাঁতের ব্যাথা / সমস্যা    | <input type="checkbox"/> ম্যালেরিয়া  | <input type="checkbox"/> চর্মরোগ      |
| <input type="checkbox"/> জন্ডিস             | <input type="checkbox"/> আইবিএস                    | <input type="checkbox"/> ব্রন         | <input type="checkbox"/> কৃমিজনিত রোগ |
| <input type="checkbox"/> সাইনুসাইটিস        | <input type="checkbox"/> অন্যান্য শ্বাসজনিত সমস্যা | <input type="checkbox"/> টাইফয়েড     | <input type="checkbox"/> কোনটিই নয়   |
| <input type="checkbox"/> প্রযোজ্য নয়       |                                                    |                                       |                                       |

১৬. উপরের রোগের কোনোটির (প্রশ্ন -১৫) জন্য ঔষধ খেয়েছিলেন?  হ্যাঁ  না

১৭. কোন ধরণের ঔষধ খেয়েছিলেন? (প্রযোজ্য ক্ষেত্রে একাধিক টিক চিহ্ন দিন)

- |                                          |                                        |                                                |                                            |
|------------------------------------------|----------------------------------------|------------------------------------------------|--------------------------------------------|
| <input type="checkbox"/> জ্বরের ঔষধ      | <input type="checkbox"/> ব্যাথার ঔষধ   | <input type="checkbox"/> এন্টিবায়োটিক         | <input type="checkbox"/> গ্যাস্ট্রিকের ঔষধ |
| <input type="checkbox"/> ডায়ারিয়ার ঔষধ | <input type="checkbox"/> কফ নিবারক ঔষধ | <input type="checkbox"/> চুলকানি/ এলার্জির ঔষধ | <input type="checkbox"/> ভিটামিন           |
| <input type="checkbox"/> বমির ঔষধ        | <input type="checkbox"/> ঘুমের ঔষধ     | <input type="checkbox"/> জন্ম নিয়ন্ত্রন বডি   | <input type="checkbox"/> ইনসুলিন           |
| <input type="checkbox"/> হার্টের ঔষধ     | <input type="checkbox"/> স্টেরয়েড     | <input type="checkbox"/> প্রজোজ্য নয়          |                                            |

১৮. ঔষধের উৎস কোনটি ছিল ( প্রযোজ্য ক্ষেত্রে একাধিক টিক চিহ্ন দিন)?

- স্থানীয় ঔষধের দোকান
- ডাক্তার (প্রেসক্রিপশনসহ)
- ডাক্তার/ কমিউনিটি চিকিৎসাকর্মী (প্রেসক্রিপশন ছাড়া)
- পূর্ব অভিজ্ঞতা
- পূর্বে প্রদানকৃত প্রেসক্রিপশন
- পরিবার অথবা বন্ধুবান্ধব
- ইন্টারনেট
- টেলিমেডিসিন
- ভেষজ/ কবিরাজি/ বৈদ্য চিকিৎসা
- প্রদানযোগ্য নয়

১৯. কতোবার ডাক্তারের পরামর্শ ছাড়া ঔষধ সেবন করেছেন?

- |                                       |                                                  |                                       |
|---------------------------------------|--------------------------------------------------|---------------------------------------|
| <input type="checkbox"/> কখনো না      | <input type="checkbox"/> বছরে এক বার             | <input type="checkbox"/> বছরে ২-৫ বার |
| <input type="checkbox"/> বছরে ১০ বার  | <input type="checkbox"/> বছরে ১০ বারের থেকে বেশি | <input type="checkbox"/> সবসময়       |
| <input type="checkbox"/> প্রযোজ্য নয় |                                                  |                                       |

২০. আপনার বাসা থেকে সবচেয়ে কাছের হাসপাতাল কতোদূরে (কিলোমিটার)?

উত্তর : ..... কিলোমিটার

২১. আপনার বাসা থেকে সবচেয়ে কাছের ফার্মেসী কতোদূরে (কিলোমিটার)?

উত্তর : ..... কিলোমিটার

২২. আপনার পরিবারের মাসিক আয় কতো (টাকায়)?

<২০ হাজার

২০-<৩৫ হাজার

৩৫-<৫০ হাজার

৫০-<৭৫ হাজার

৭৫-<১ লাখ

>১ লাখ
