# Supplementary material for: Risk factors associated with self-medication among the indigenous communities of Chittagong Hill Tracts, Bangladesh
Source: PLOS journal article supplement (doi:10.1371/journal.pone.0269622), 2022-06-13
Supplement: S5 (10.1371/journal.pone.0269622.s005) [file journal.pone.0269622.s005]

## Self-medication among Indigenous People in Bangladesh

Interviewer's ID:

Date of interview:

The participant has given his/her consent to voluntarily participate in this study:  Yes  No

1. Name:

2. Current address: Para/village: ....., Police station: .....,

Post office: ..... Upazila: ....., District: ....., Bangladesh

3. Permanent address: Para/village: ....., Police station: .....,

Post office: ..... Upazila: ....., District: ....., Bangladesh

4. Phone no (Mandatory):

### ➤ Questionnaire Section I: Socio Demographic Variables

5. Marital status:  Never married  Married  Separated/Divorced  Widow/widower

6. Age:

7. Ethnicity:  Chakma  Marma  Tripura  Tanchangya  Bawm  Others .....

8. District:  Khagrachhari  Rangamati  Bandarban

9. Height: ..... ft..... inch

10. Weight: .....kg\*

11. Gender:  Male  Female  Others .....

12. Educational Status:

Illiterate  Primary  Secondary  Higher secondary  Graduate

13. Occupation:

Agricultural work  Day labor  Business  Healthcare work  Handloom

Housewife  Service  Student  Unemployed  Others .....

➤ **Questionnaire Section II: Morbidities and medication practices**

**14.** Do you currently have any of the following diseases? (tick more than one if applicable)

- |                                              |                                         |                                                |
|----------------------------------------------|-----------------------------------------|------------------------------------------------|
| <input type="checkbox"/> Heart disease       | <input type="checkbox"/> Skin infection | <input type="checkbox"/> Neurological disorder |
| <input type="checkbox"/> Respiratory disease | <input type="checkbox"/> Eye problem    | <input type="checkbox"/> Kidney disease        |
| <input type="checkbox"/> Hypertension        | <input type="checkbox"/> Cancer         | <input type="checkbox"/> Anxiety disorder      |
| <input type="checkbox"/> Liver disease       | <input type="checkbox"/> Diabetes       | <input type="checkbox"/> Hypotension           |
| <input type="checkbox"/> Thyroiditis         | <input type="checkbox"/> None           | <input type="checkbox"/> Not Applicable        |

**15.** Which of following diseases did you suffer in last one year? (tick more than one if applicable)

- |                                              |                                                      |
|----------------------------------------------|------------------------------------------------------|
| <input type="checkbox"/> Cough, cold & fever | <input type="checkbox"/> Headache                    |
| <input type="checkbox"/> Joint pain          | <input type="checkbox"/> Diarrhea and food poisoning |
| <input type="checkbox"/> Asthma              | <input type="checkbox"/> Dental carries & toothache  |
| <input type="checkbox"/> Malaria             | <input type="checkbox"/> Skin allergy                |
| <input type="checkbox"/> Jaundice            | <input type="checkbox"/> Irritable bowel syndrome    |
| <input type="checkbox"/> Acne                | <input type="checkbox"/> Roundworm/ Tapeworm         |
| <input type="checkbox"/> Sinusitis           | <input type="checkbox"/> Other respiratory illness   |
| <input type="checkbox"/> Typhoid             | <input type="checkbox"/> None                        |
| <input type="checkbox"/> Not applicable      |                                                      |

**16.** Have you ever taken medication due to any of the above mentioned (Q-18) conditions?

- Yes  No

**17.** What kind of medicine did you take? (tick more than one if applicable)

- |                                        |                                      |                                         |                                                      |
|----------------------------------------|--------------------------------------|-----------------------------------------|------------------------------------------------------|
| <input type="checkbox"/> Antipyretics  | <input type="checkbox"/> Analgesic   | <input type="checkbox"/> Antibiotics    | <input type="checkbox"/> Antacids and Anti-ulcerants |
| <input type="checkbox"/> Antidiarrheal | <input type="checkbox"/> Antitussive | <input type="checkbox"/> Anti-allergic  | <input type="checkbox"/> Vitamins                    |
| <input type="checkbox"/> Antiemetic    | <input type="checkbox"/> Sedatives   | <input type="checkbox"/> Contraceptives | <input type="checkbox"/> Insulin                     |
| <input type="checkbox"/> Beta blockers | <input type="checkbox"/> Steroids    | <input type="checkbox"/> Not applicable |                                                      |

**18. Source of that medicine (tick more than one if applicable):**

- Community pharmacy
- Doctor's with prescription
- Doctor's/ Community health workers without prescription
- Self-medication experience from previous treatment
- Previous prescription
- Family & friends
- Internet
- Telemedicine
- Folk medicine practitioner/ Kobiraj/ Ojha
- Not applicable

**19. How frequently did you use self-prescribed medication?**

- Never
- Once in a year
- 2-5 times in a year
- 10 times/year
- >10 times/year
- Always
- Not applicable

**20. How far (in km) is the health care center from your residence?**

Answer: ..... km

**21. How far (in km) is the nearest pharmacy from your residence?**

Answer: ..... km

**22. Monthly family income (in TK):**

- <20k
- 20k - <35k
- 35k -<50k
- 50k - <75k
- 75k - <100k
- >100k
